# Supplementary material
Source: MDPI journal article supplement (https://www.mdpi.com/2571-8789/8/1/18)
Supplement: s1 [file s1]

Table S1: Effect of UN, PM and zeolite on pH, organic matter content, total N, available P and extractable K of post-harvest soil.

| Treatments                                                              | Total soil N<br>(g kg <sup>-1</sup> ) | Soil available<br>P (mg kg <sup>-1</sup> ) | Soil<br>extractable<br>K (mg kg <sup>-1</sup> ) | Soil pH | Soil organic<br>matter<br>(g kg <sup>-1</sup> ) |
|-------------------------------------------------------------------------|---------------------------------------|--------------------------------------------|-------------------------------------------------|---------|-------------------------------------------------|
| Control                                                                 | 0.4 d                                 | 6.5 f                                      | 82 e                                            | 7.3 bc  | 7.8 d                                           |
| UN <sub>120</sub>                                                       | 0.4 d                                 | 6.8 f                                      | 87 e                                            | 7.0 d   | 8.2 d                                           |
| PM <sub>120</sub>                                                       | 0.5 ab                                | 9.1 ab                                     | 132 abc                                         | 7.5 ab  | 9.9 abc                                         |
| Z <sub>1</sub>                                                          | 0.4 d                                 | 7.2 ef                                     | 98 de                                           | 7.4 abc | 7.9 d                                           |
| Z <sub>2</sub>                                                          | 0.4 d                                 | 7.2 def                                    | 103 de                                          | 7.4 abc | 7.9 d                                           |
| UN <sub>120</sub> +Z <sub>1</sub>                                       | 0.4 d                                 | 7.2 def                                    | 99 de                                           | 7.2 c   | 8.3 cd                                          |
| PM <sub>120</sub> +Z <sub>1</sub>                                       | 0.5 a                                 | 9.2 ab                                     | 138 ab                                          | 7.5 a   | 10.3 a                                          |
| UN <sub>120</sub> +Z <sub>2</sub>                                       | 0.4 cd                                | 7.8 cde                                    | 103 de                                          | 7.2 c   | 8.4 cd                                          |
| PM <sub>120</sub> +Z <sub>2</sub>                                       | 0.5 ab                                | 9.2 a                                      | 136 abc                                         | 7.5 ab  | 10.2 ab                                         |
| UN <sub>60</sub> +PM <sub>60</sub> +Z <sub>1</sub>                      | 0.4 bcd                               | 8.1 c                                      | 115 bcd                                         | 7.4 abc | 8.7 a                                           |
| UN <sub>60</sub> +PM <sub>60</sub> +Z <sub>2</sub>                      | 0.5 abc                               | 8.0 cd                                     | 113 cd                                          | 7.4 abc | 8.9 a                                           |
| UN <sub>60</sub> +PM <sub>60</sub> +½ Z <sub>1</sub> + ½ Z <sub>2</sub> | 0.5 ab                                | 8.3 bc                                     | 142 a                                           | 7.4 abc | 8.5 bcd                                         |
| LSD ( <i>P</i> ≤ 0.05)                                                  | 0.057                                 | 0.84                                       | 23.77                                           | 0.207   | 1.666                                           |

Means sharing the same letters in the column do not differ significantly at 5% probability. UN= urea nitrogen; PM= poultry manure; Z<sub>1</sub> and Z<sub>2</sub> = zeolites. UN= urea nitrogen; PM= poultry manure; Z<sub>1</sub> and Z<sub>2</sub> = zeolites.
